# Supplementary material
Source: publisher figshare collection journal article supplement (https://gsapubs.figshare.com/articles/dataset/_/13667660)

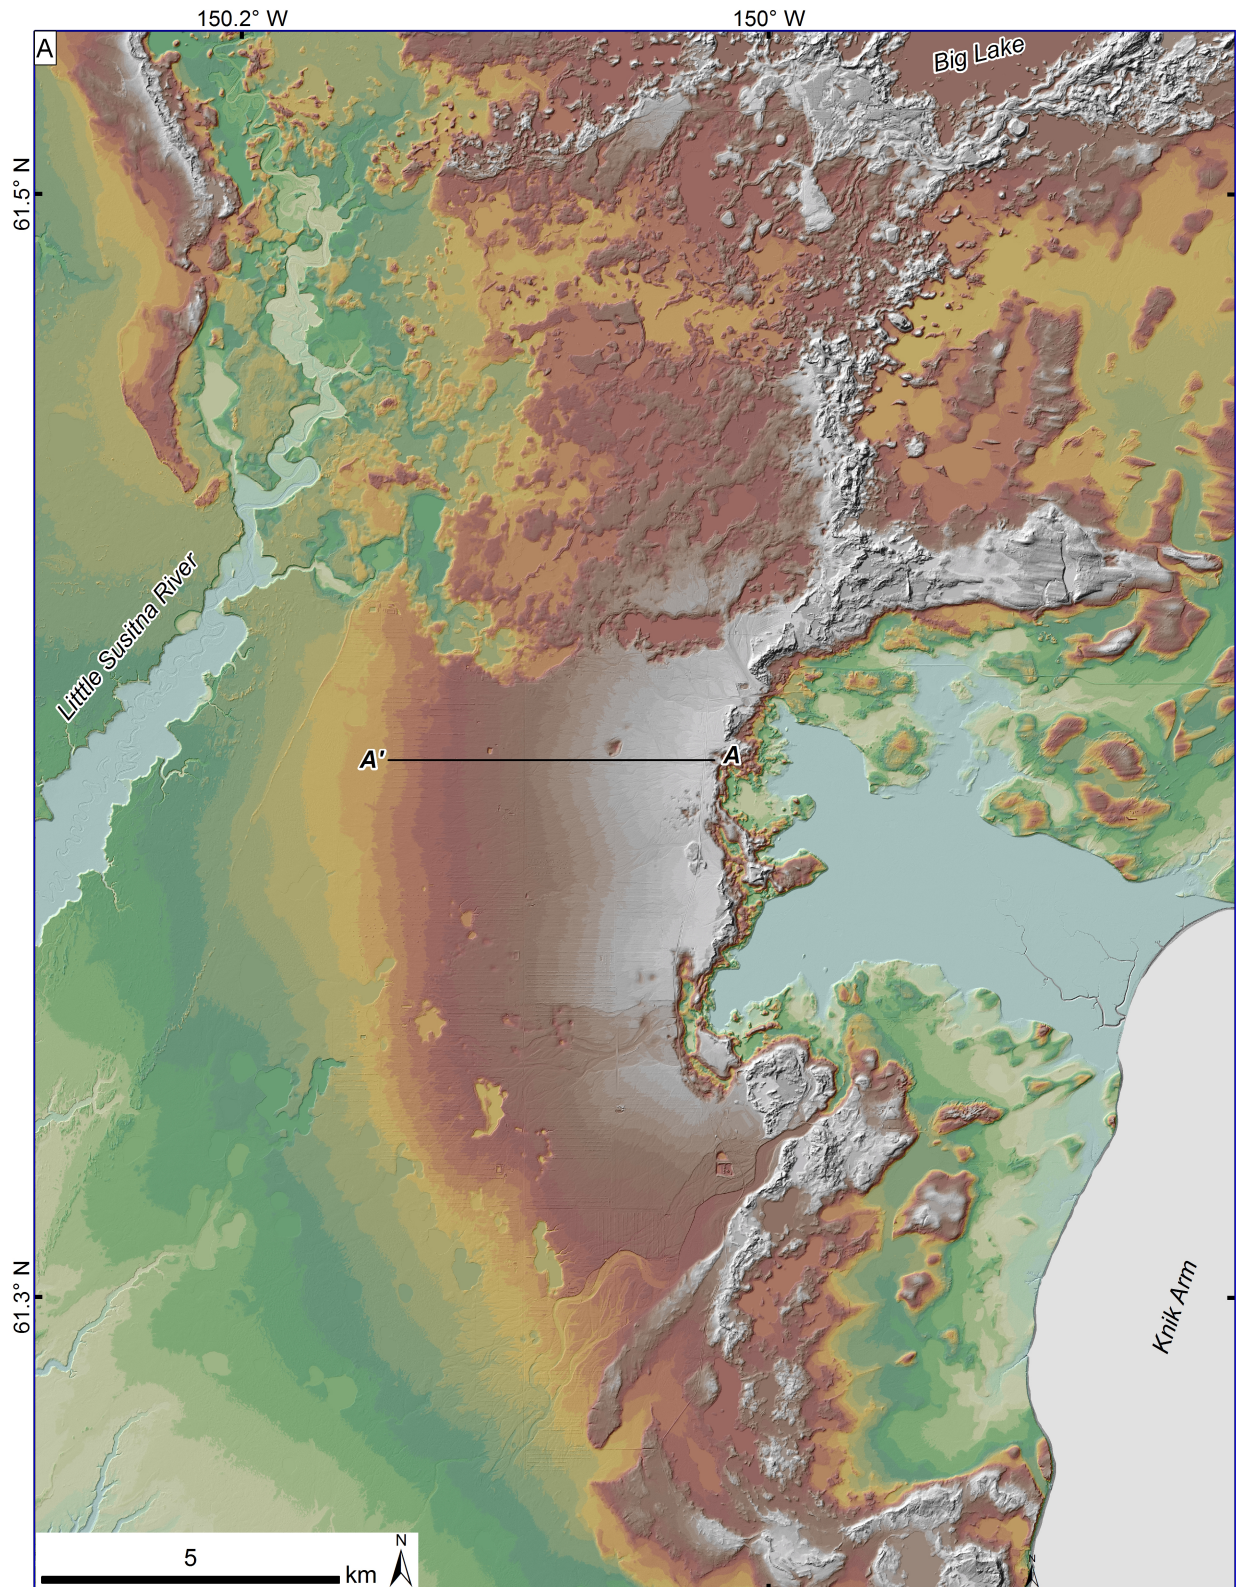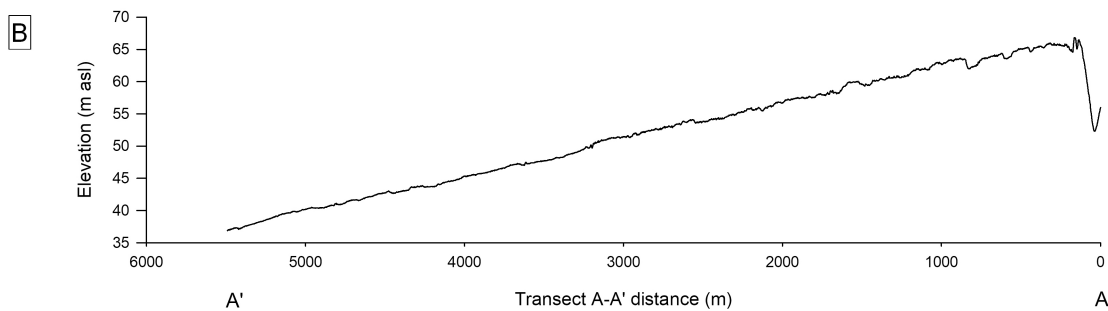

# Moraines

Fig. S2, p. 1 of 2

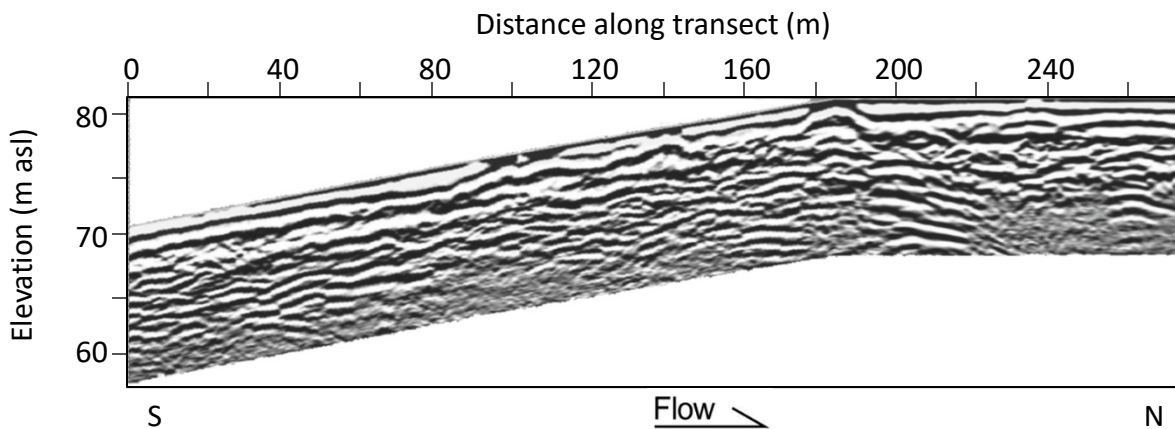

AL (50 MHz)  
Alder Lane

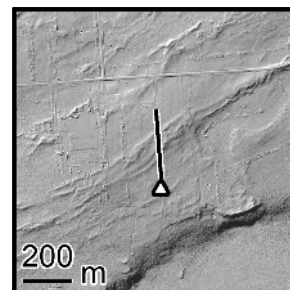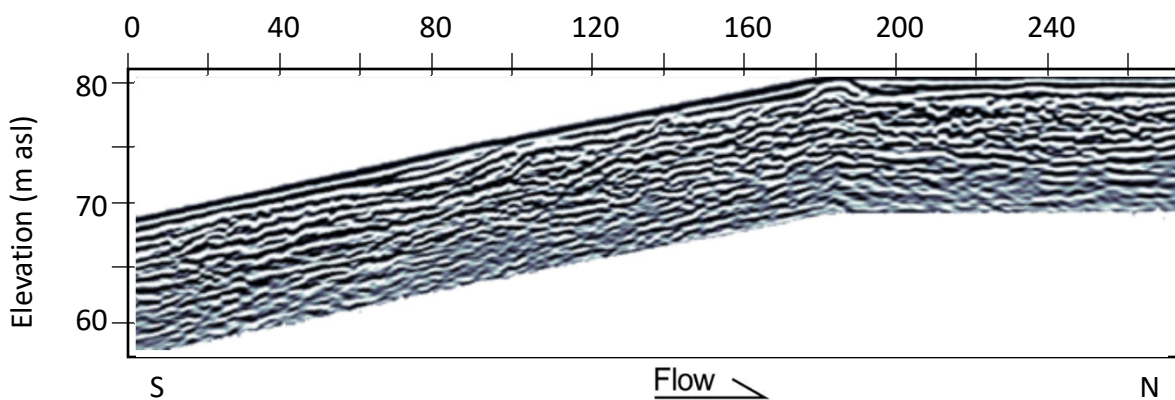

AL (100 MHz)  
Alder lane

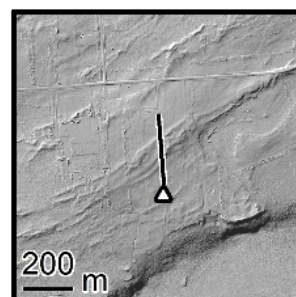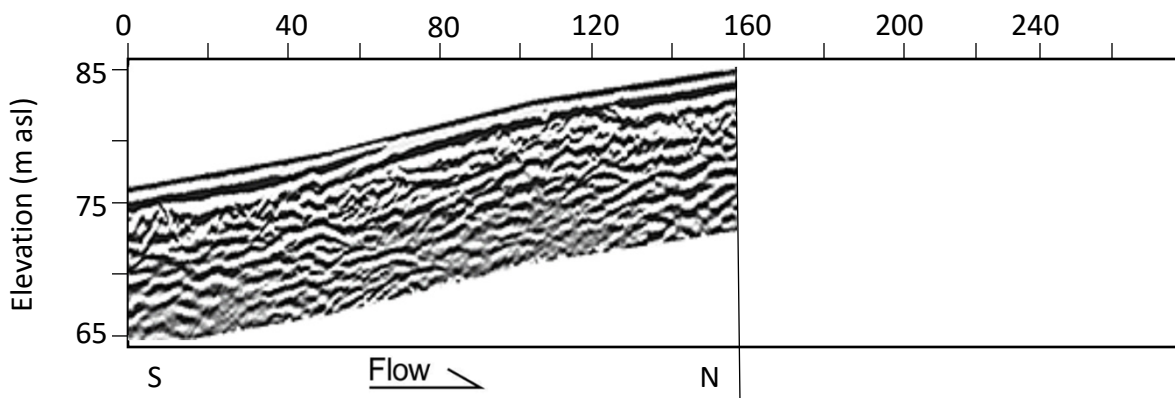

SC<sub>a</sub> (50 MHz)  
S. Cotten Drive

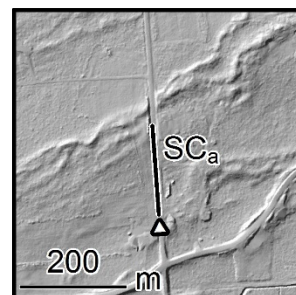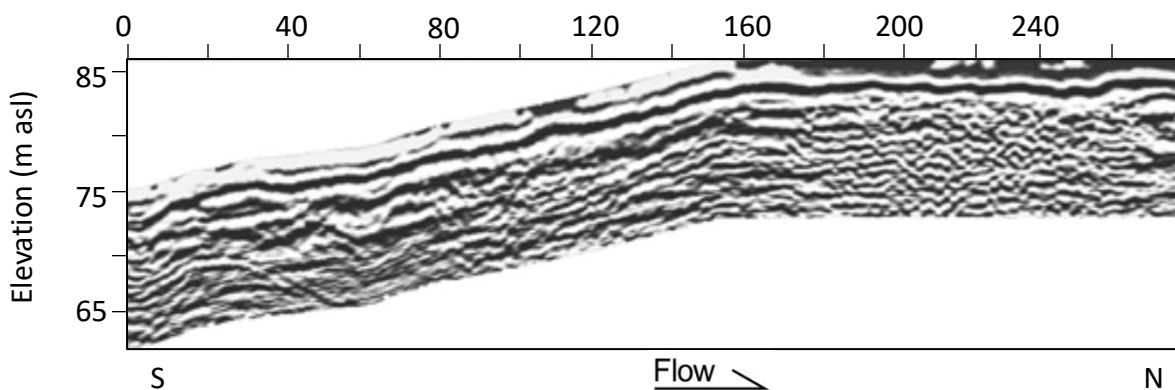

SC (100 MHz)  
S. Cotten Drive

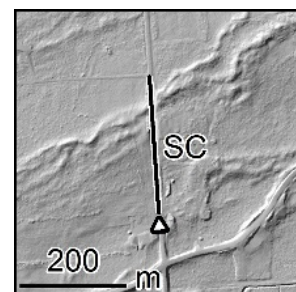

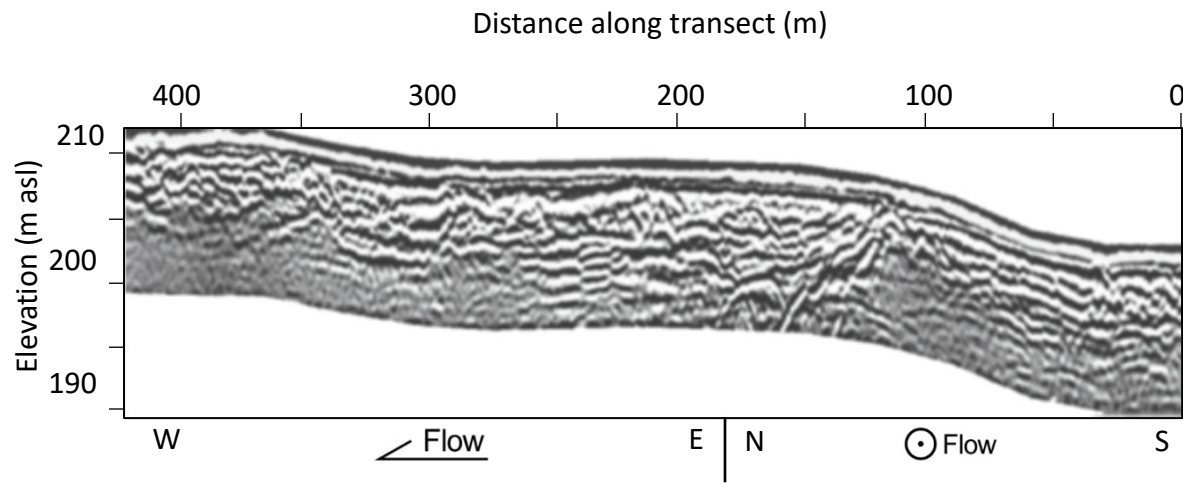

LM (50 MHz)  
Lateral moraine

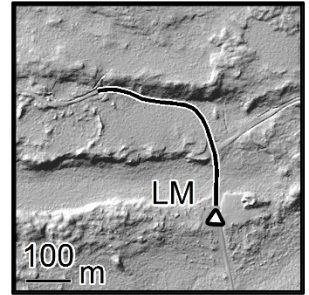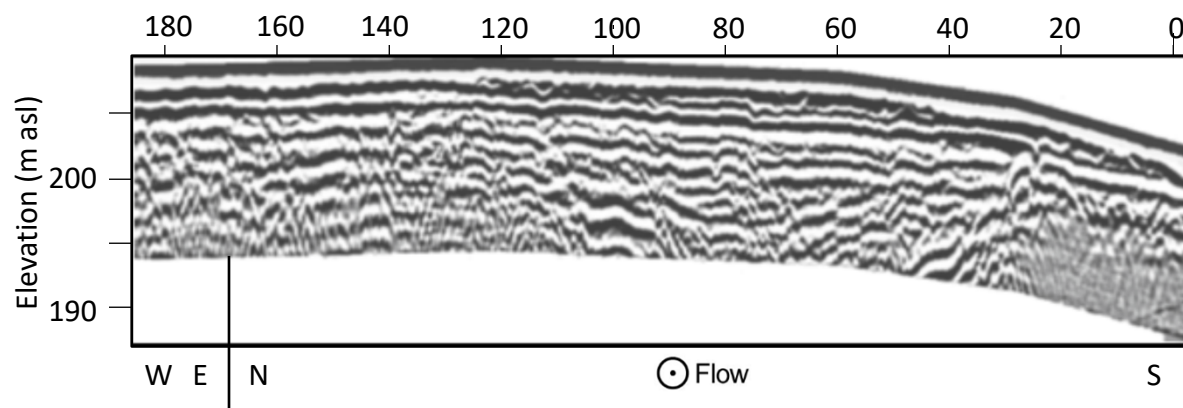

LM<sub>a</sub> (100 MHz)  
Lateral moraine

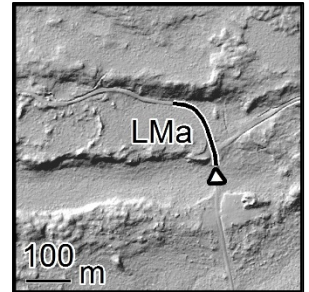

# Drumlins

Fig. S3

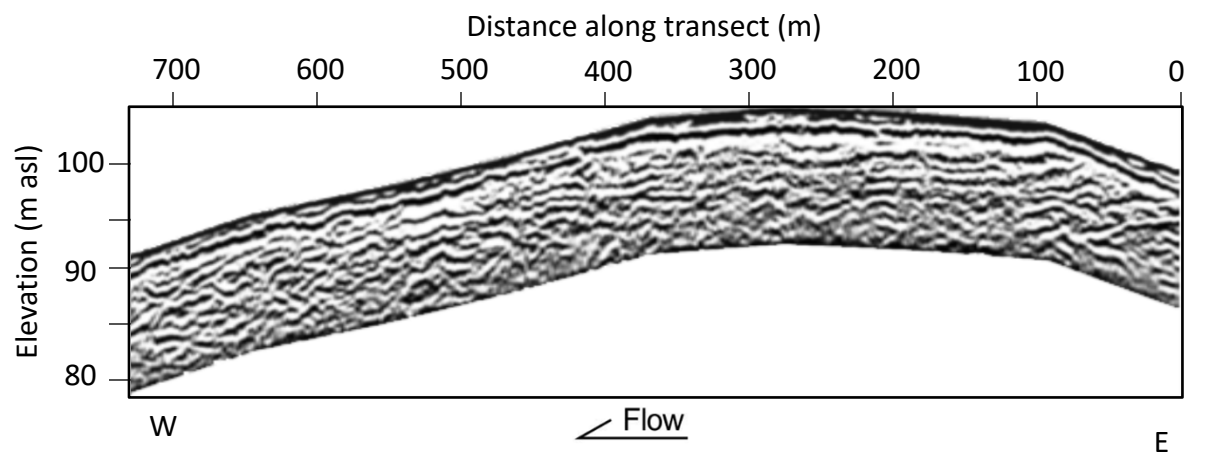

HR (50 MHz)  
W. Hollywood Road

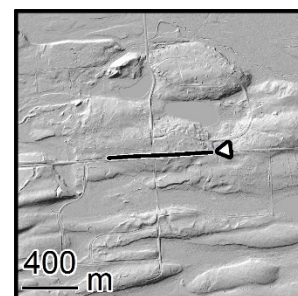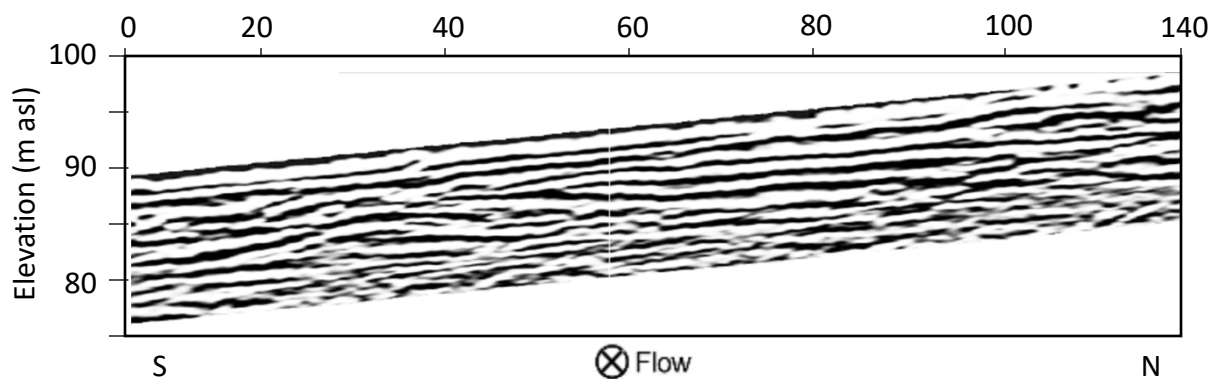

AD (50 MHz)  
S. Andrea Drive

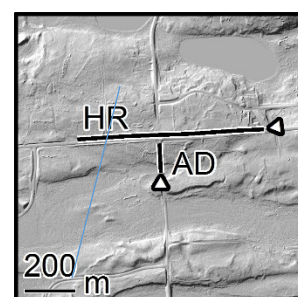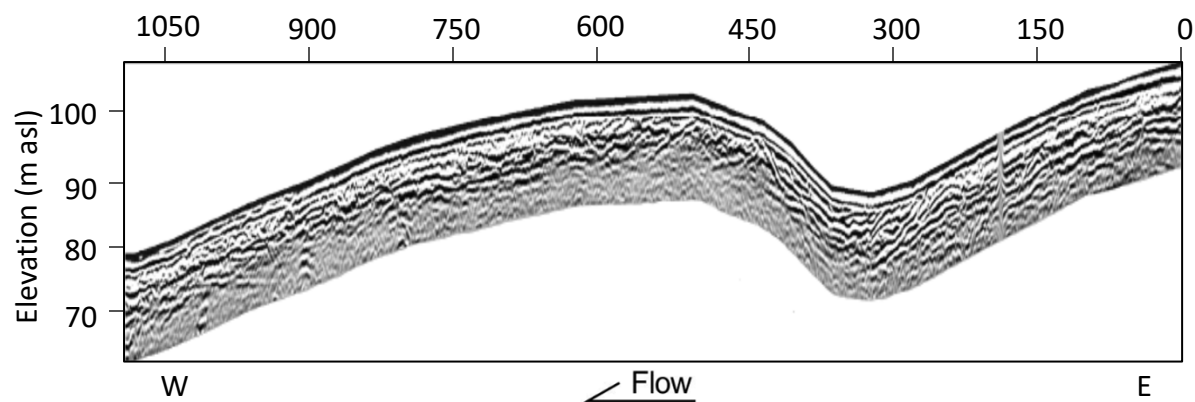

CR (50 MHz)  
W. Carmel Road

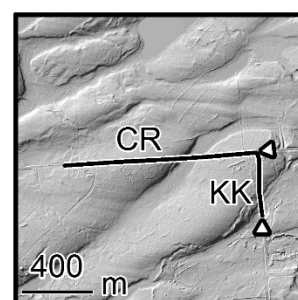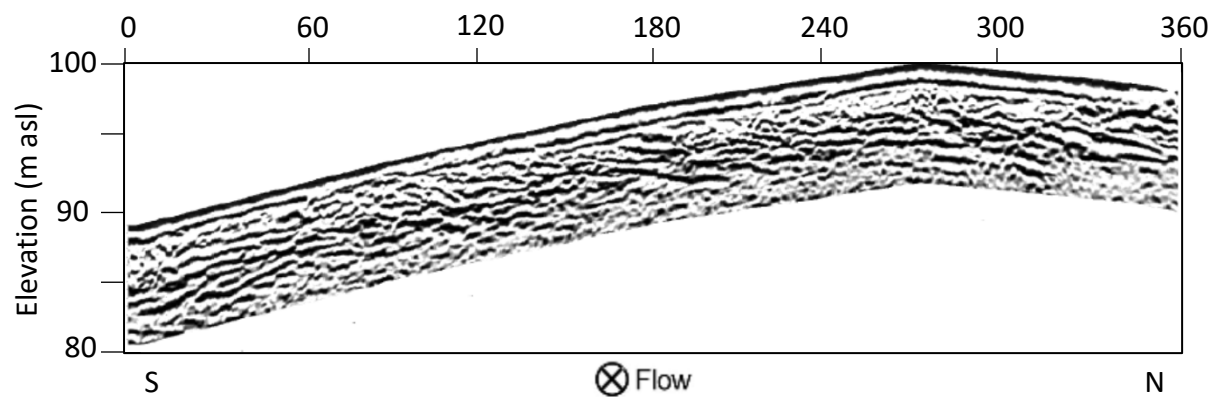

KK (50 MHz)  
S. Knik Knack  
Mud Shack Road

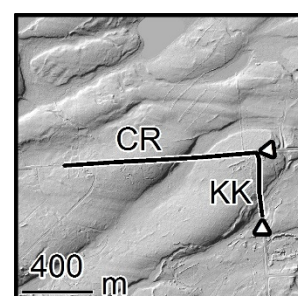

# Very large dunes

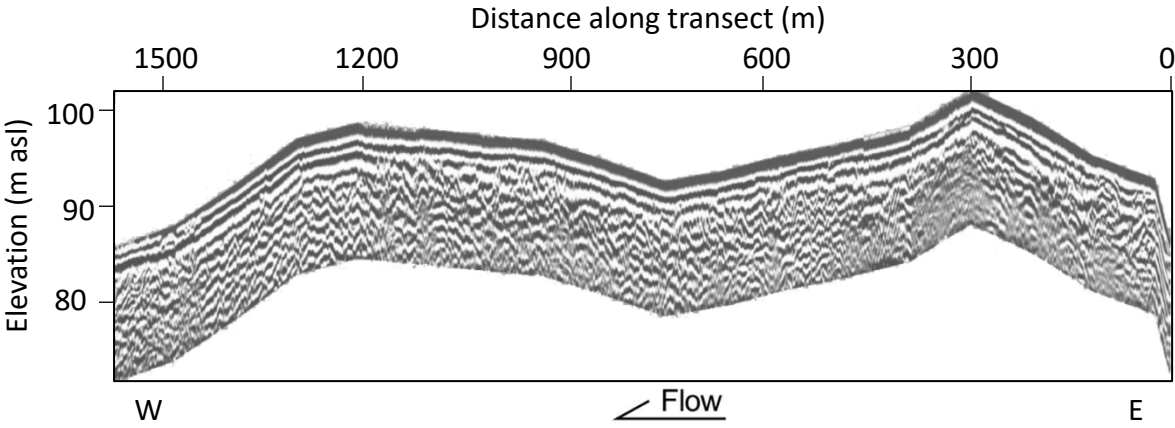

KA (50 MHz)  
W. King Arthur Drive

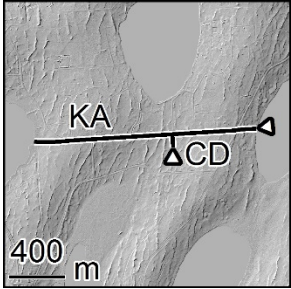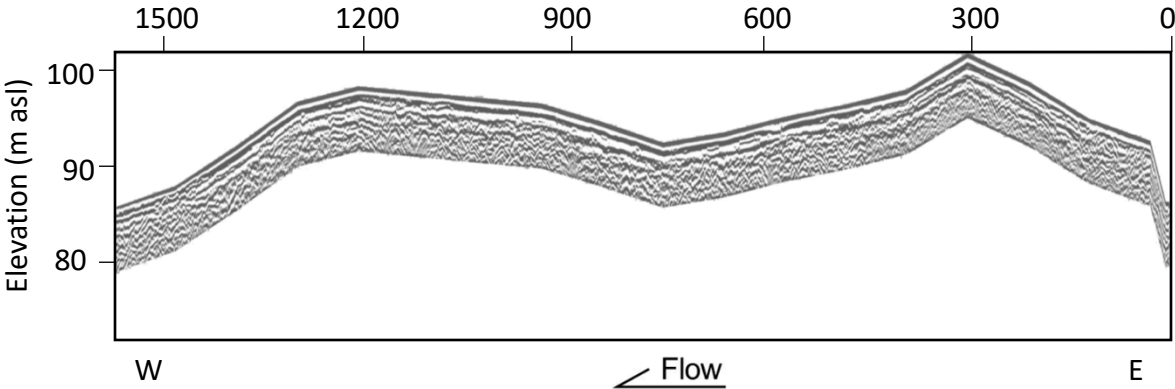

KA (100 MHz)  
W. King Arthur Drive

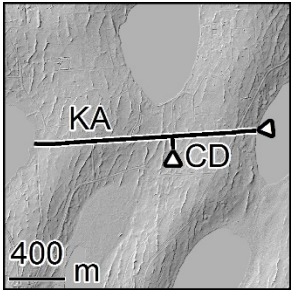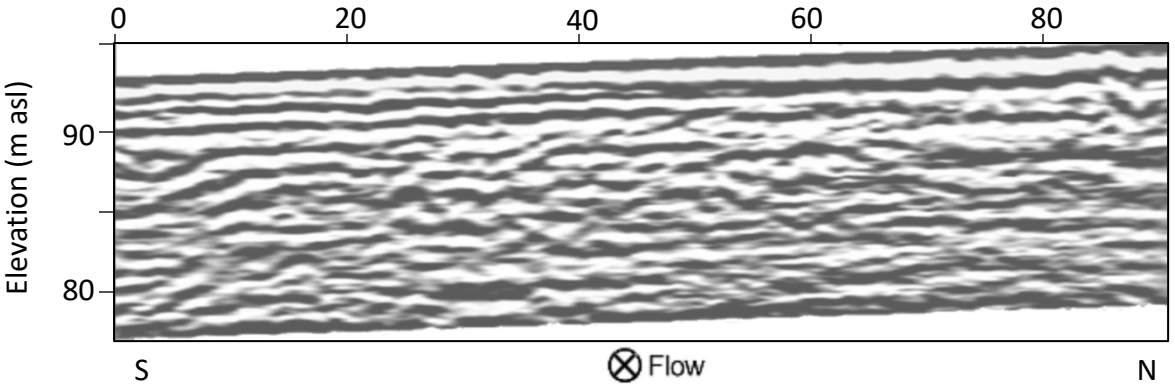

CD (50 MHz)  
N. Castle Drive

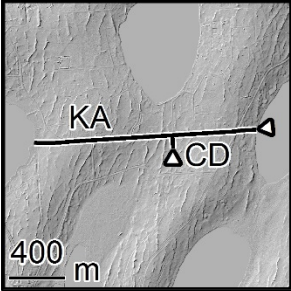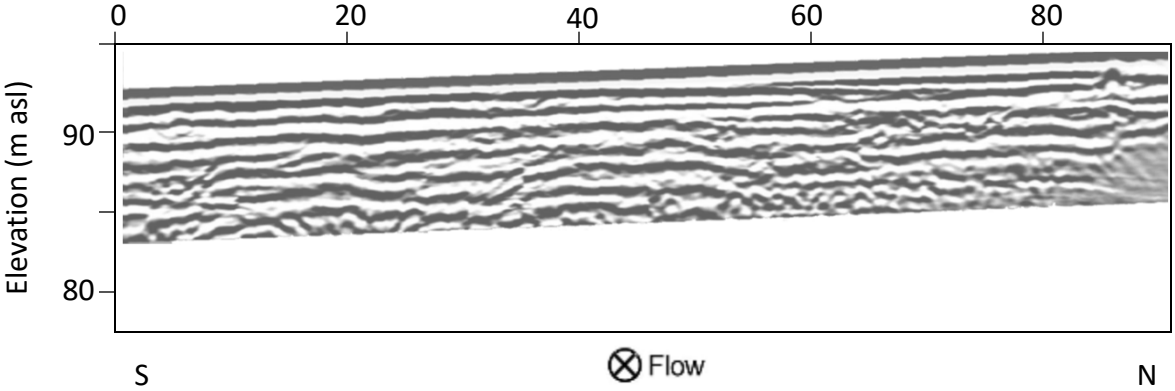

CD (100 MHz)  
N. Castle Drive

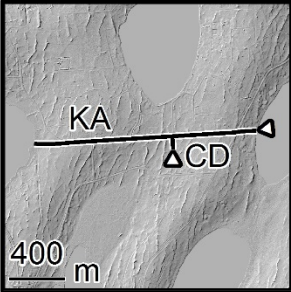

# Very large dunes (Page 2 of 3)

Fig. S4, p. 2 of 3

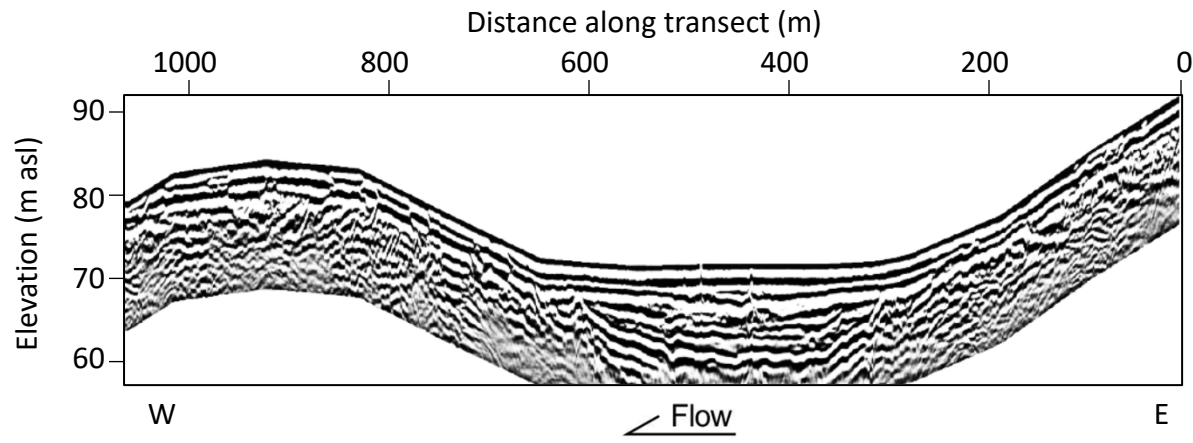

DR (50 MHz)  
W. Delroy Road

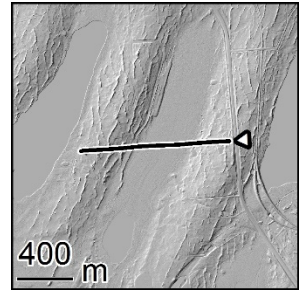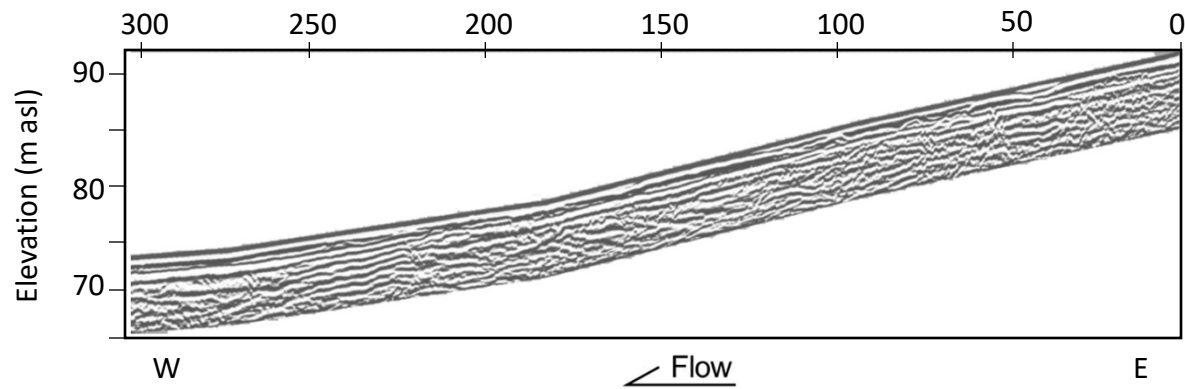

DR<sub>a</sub> (100 MHz)  
W. Delroy Road

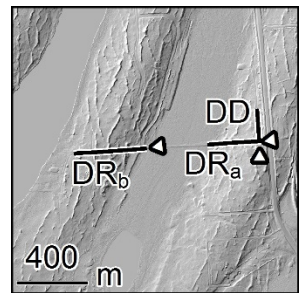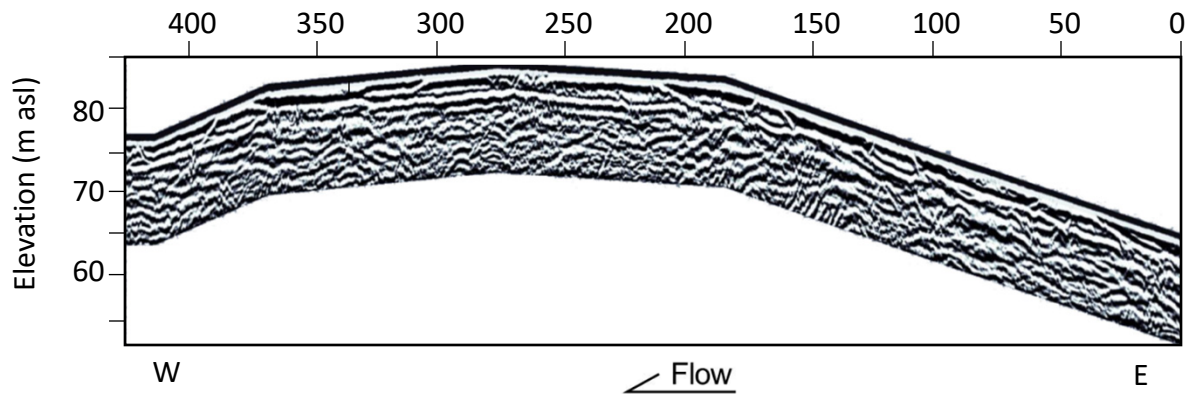

DR<sub>b</sub> (100 MHz)  
W. Delroy Road

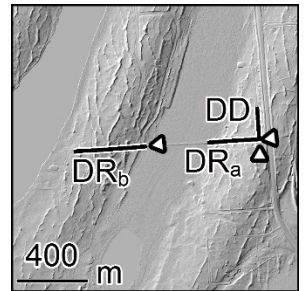

# Very large dunes (Page 3 of 3)

Fig. S4, p. 3 of 3

DD (50 MHz)  
N. Dodge Drive

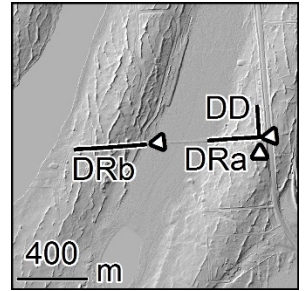

DD (100 MHz)  
N. Dodge Drive

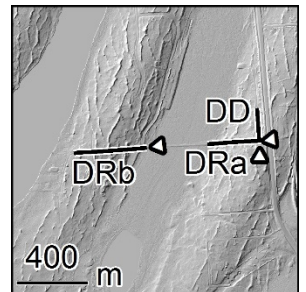

Distance along transect (m)

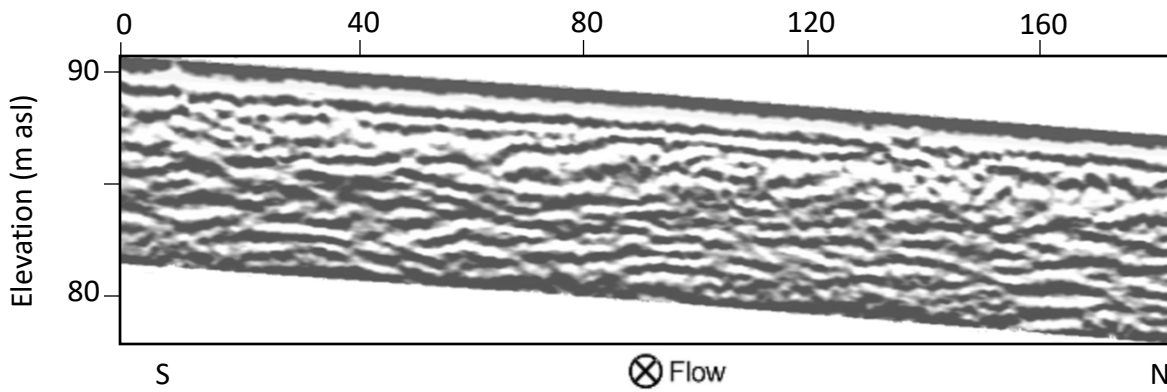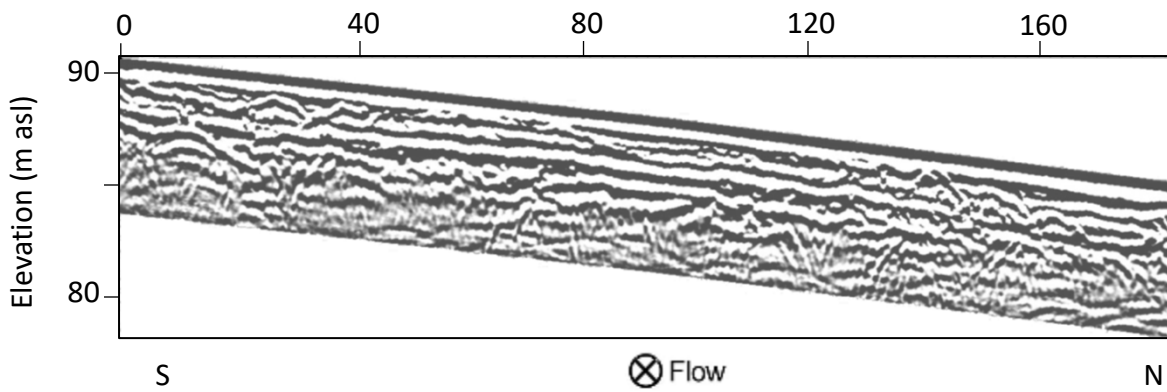

# Large dunes

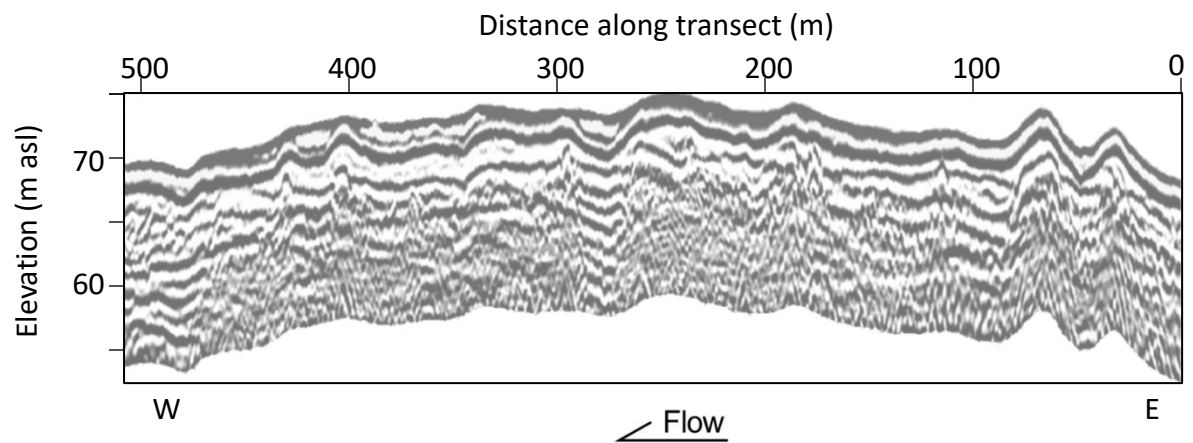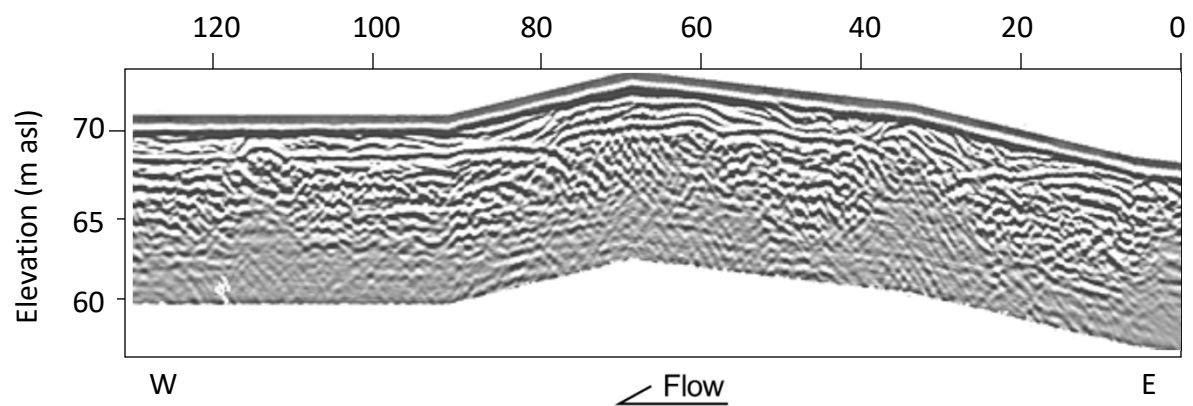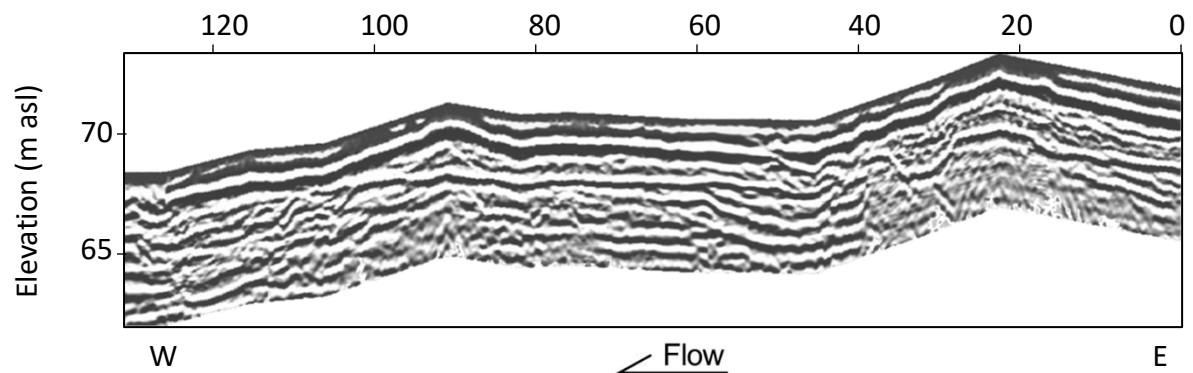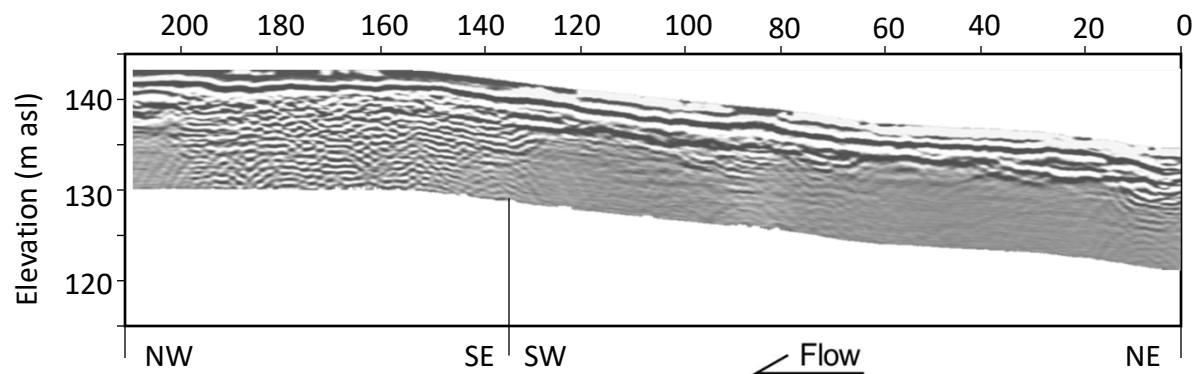

Fig. S5

HL (50 MHz)  
W. Hawk Lane

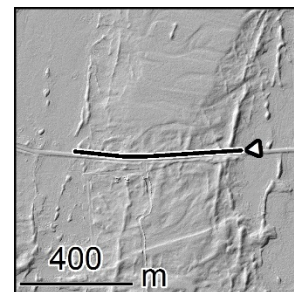

HL<sub>a</sub> (100 MHz)  
W. Hawk Lane

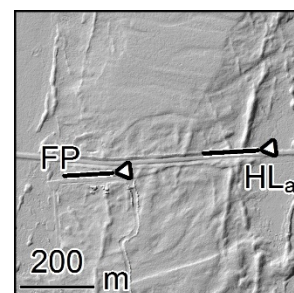

FP (100 MHz)  
W. Frances Clar  
powerline

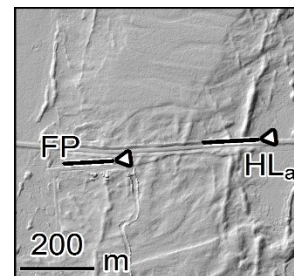

ZL (50 MHz)  
W. Zero Lake  
logging road

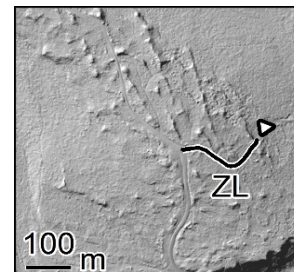

# Crevasse fill

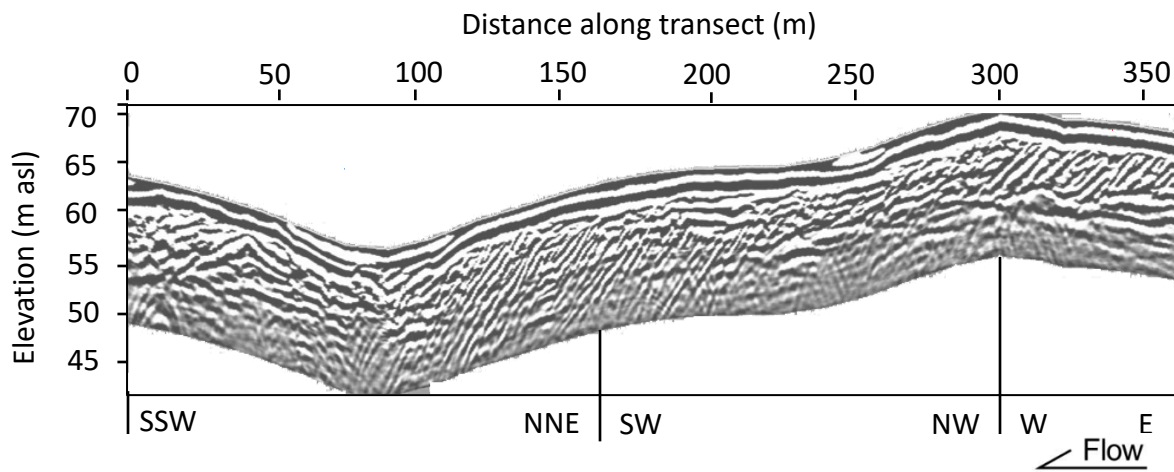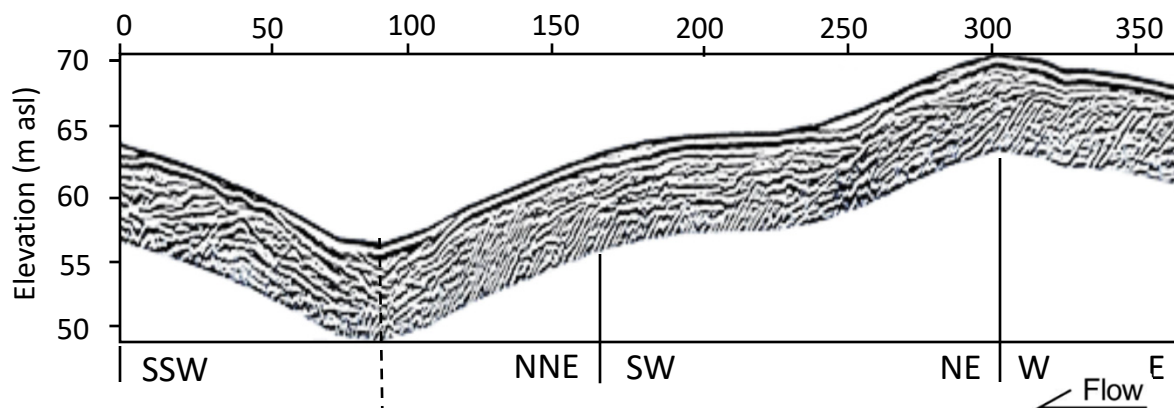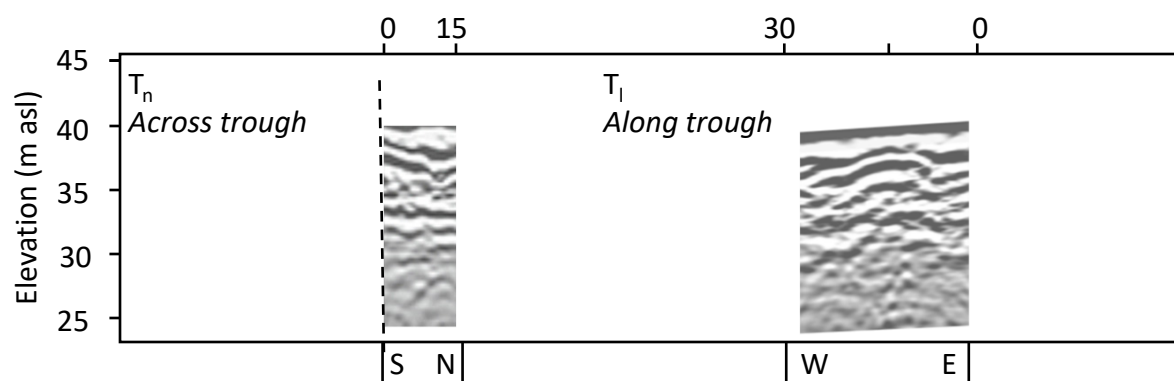

Fig. S6

JL (50 MHz)  
Johnson Lake trail

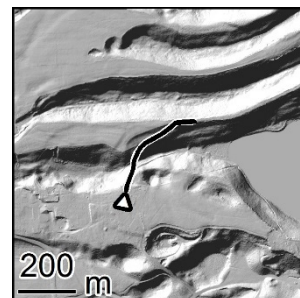

JL (100 MHz)  
Johnson Lake trail

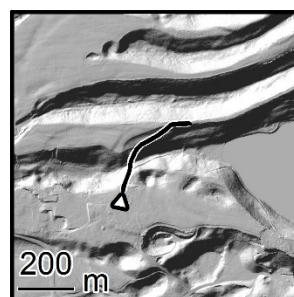

$T_n$ ,  $T_l$  (50 MHz)  
Trough between filled  
crevasses

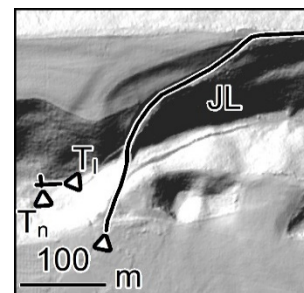

# ESKER

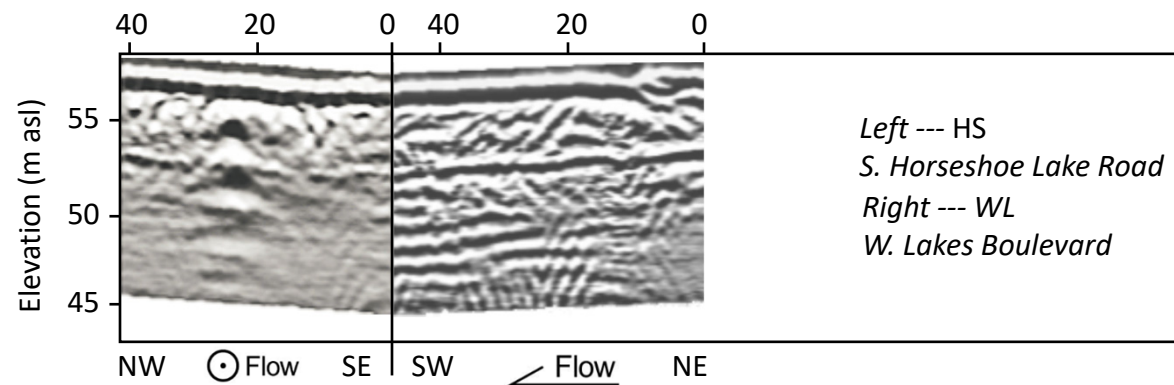

HS, WL (50 MHz)  
Esker

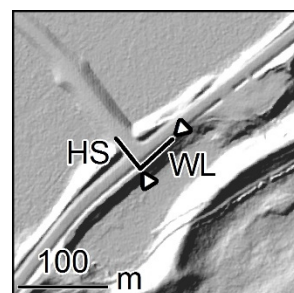

Supplement: Supplementary file 1 [file 1]
