# Supplementary material
Source: publisher figshare collection journal article supplement (https://gsapubs.figshare.com/articles/dataset/_/13667660)
Supplement: Supplementary file 2 [file 1]

This **Supplemental Material** accompanies Wiedmer, R.M., Gillespie, A.R., Montgomery, D.R., and Greenberg, H.M., 2021, Further evidence for the Matanuska megaflood hypothesis, Alaska, *in* Waitt, R.B., Thackray, G.D., and Gillespie, A.R., eds., *Untangling the Quaternary Period—A Legacy of Stephen C. Porter*: Geological Society of America Special Paper 548, [https://doi.org/10.1130/2021.2548\(19\)](https://doi.org/10.1130/2021.2548(19)).

TABLE S1. GROUND-PENETRATING RADAR TRANSECTS. LOCATIONS ARE THOSE USED IN FIGURES 2, 3, 17, S2–S6, AND IN THE MAIN TEXT.

| Location        | Road/site                     | Length<br>(m) | Landform                                      | Beginning<br>(DDD.DDDD°) |           | End<br>(DDD.DDDD°) |           | Surface      | Antenna<br>(MHz) |
|-----------------|-------------------------------|---------------|-----------------------------------------------|--------------------------|-----------|--------------------|-----------|--------------|------------------|
|                 |                               |               |                                               | Lat.                     | Long.     | Lat.               | Long.     |              |                  |
| AD              | S. Andrea Drive               | 116           | Drumlin                                       | 61.5415                  | -149.7076 | 61.5405            | -149.7077 | Gravel       | 50               |
| AL              | S. Alder Lane                 | 274           | Moraine                                       | 61.5525                  | -149.4015 | 61.5550            | -149.4015 | Gravel       | 50, 100          |
| CD              | N. Castle Drive               | 91            | Very large dune                               | 61.6139                  | -149.7346 | 61.6130            | -149.7346 | Gravel       | 50, 100          |
| CR              | W. Carmel Road                | 1095          | Drumlin                                       | 61.5127                  | -149.6905 | 61.5127            | -149.7108 | Gravel       | 50               |
| DD              | N. Dodge Drive                | 184           | Very large dune                               | 61.5994                  | -149.7618 | 61.6010            | -149.7618 | Gravel       | 50, 100          |
| DR              | W. Delroy Road                | 1060          | Very large dune                               | 61.5994                  | -149.7616 | 61.5994            | -149.7814 | Gravel       | 50               |
| DR <sub>a</sub> | W. Delroy Road Transect 1     | 308           | Very large dune                               | 61.5994                  | -149.7616 | 61.5994            | -149.7672 | Gravel       | 100              |
| DR <sub>b</sub> | W. Delroy Road Transect 2     | 426           | Very large dune                               | 61.5994                  | -149.7737 | 61.5994            | -149.7814 | Gravel       | 100              |
| FP              | W. Frances Clar Powerline     | 132           | Large and very large dune                     | 61.5851                  | -149.7916 | 61.5851            | -149.7941 | Undisturbed  | 100              |
| HL              | W. Hawk Lane                  | 507           | Large and very large dune                     | 61.5854                  | -149.7843 | 61.5857            | -149.7954 | Native soil  | 50               |
| HL <sub>a</sub> | W. Hawk Lane 100 MHz          | 131           | Large and very large dune                     | 61.5854                  | -149.7843 | 61.5854            | -149.7871 | Native soil  | 100              |
| HR              | W. Hollywood Road             | 731           | Drumlin                                       | 61.5417                  | -149.6999 | 61.5418            | -149.7136 | Paved        | 50               |
| HS              | S. Horseshoe Lake Road        | 43            | Esker                                         | 61.5636                  | -149.9061 | 61.5639            | -149.9065 | Gravel/Paved | 50               |
| JL              | Johnson Lake trail            | 367           | Crevasse fill                                 | 61.5666                  | -149.2459 | 61.5686            | -149.2413 | Gravel       | 50, 100          |
| KA              | W. King Arthur Drive          | 1585          | Very large dune                               | 61.6140                  | -149.7530 | 61.6139            | -149.7233 | Paved        | 50, 100          |
| KK              | S. Knik Knack Mud Shack Road  | 362           | Drumlin                                       | 61.5127                  | -149.6905 | 61.5095            | -149.6903 | Gravel       | 50               |
| LM              | Lateral moraine               | 420           | Very large dune to lateral moraine transition | 61.6766                  | -149.8225 | 61.6790            | -149.8272 | Gravel       | 50               |
| LM <sub>a</sub> | Lateral moraine 100 MHz       | 185           | Very large dune to lateral moraine transition | 61.6774                  | -149.8224 | 61.6787            | -149.8240 | Gravel       | 100              |
| SC              | S. Cotten Drive               | 274           | Moraine                                       | 61.5574                  | -149.3902 | 61.5597            | -149.3902 | Paved        | 100              |
| SC <sub>a</sub> | S. Cotten Drive               | 157           | Moraine                                       | 61.5574                  | -149.3902 | 61.5591            | -149.3902 | Paved        | 50               |
| T <sub>l</sub>  | Trough (longitudinal to axis) | 29            | Trough between crevasse fills                 | 61.5671                  | -149.2468 | 61.5671            | -149.2473 | Undisturbed  | 50               |
| T <sub>n</sub>  | Trough (normal to axis)       | 13            | Trough between crevasse fills                 | 61.5671                  | -149.2472 | 61.5672            | -149.2472 | Undisturbed  | 50               |
| WL              | W. Lakes Boulevard            | 48            | Esker                                         | 61.5638                  | -149.9054 | 61.5636            | -149.9061 | Gravel       | 50               |
| ZL              | W. Zero Lake logging road     | 210           | Large and very large dune                     | 61.6551                  | -149.8296 | 61.6552            | -149.8265 | Native soil  | 50               |
